# Supplementary material
Source: bioRxiv or medRxiv preprint supplement (https://www.biorxiv.org/highwire/filestream/63679/field_highwire_adjunct_files/1/209221-2.pdf)

Figure S2

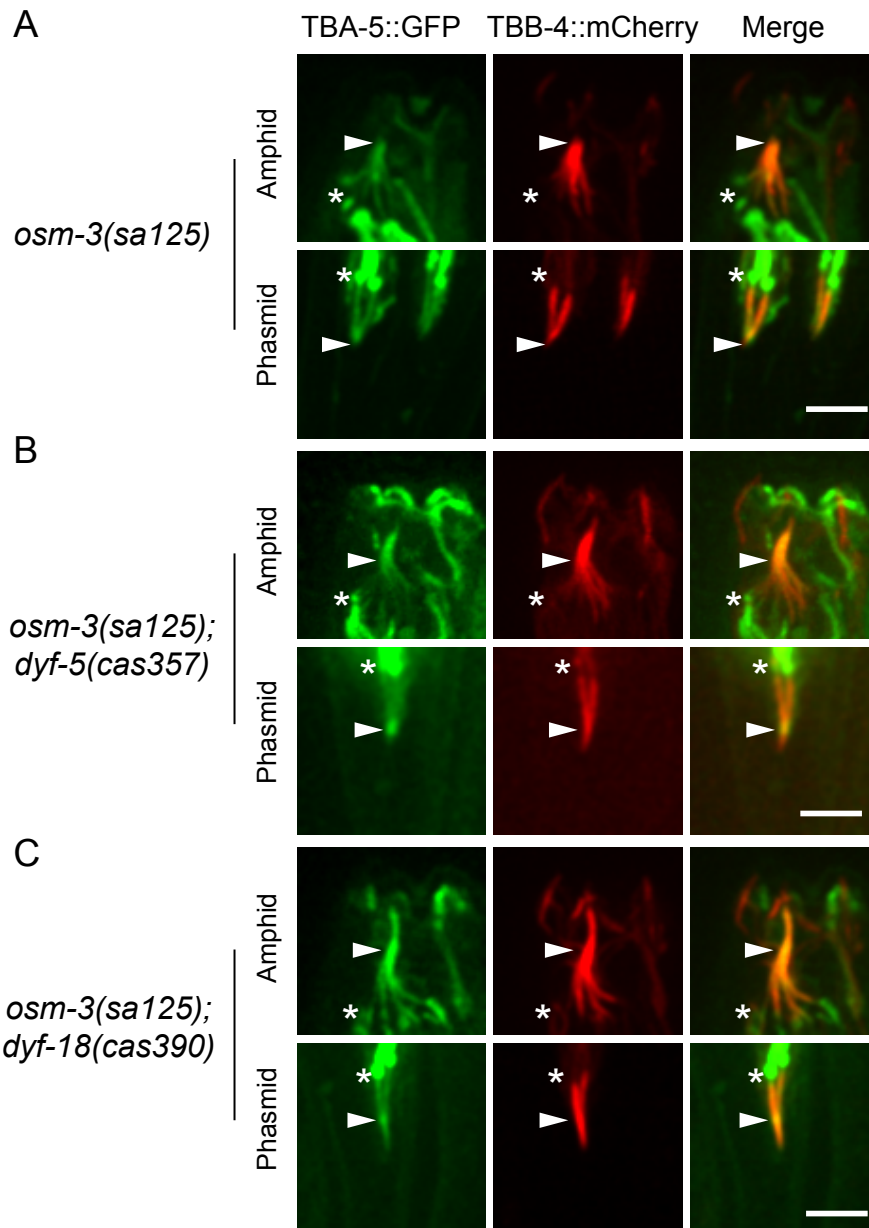

Supplement: Supplementary file [file 209221-2.pdf]
